# Supplementary figures and images for: Identification of the Novel Oncogenic Role of SAAL1 and Its Therapeutic Potential in Hepatocellular Carcinoma
Source: MDPI journal article supplement (doi:10.3390/cancers12071843), 2020-07-08

# Supplementary file 2

Figure 2A

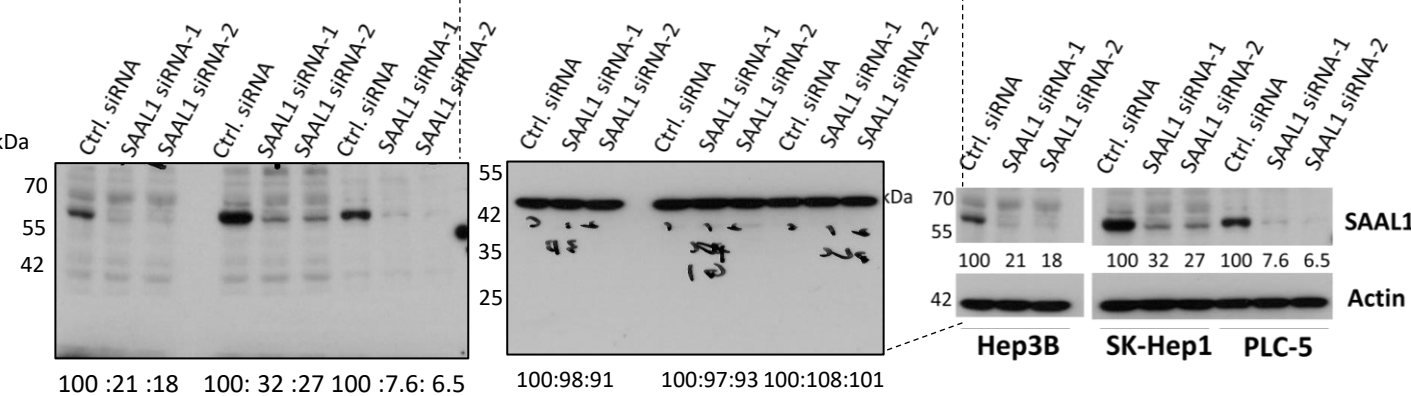

Figure 4A

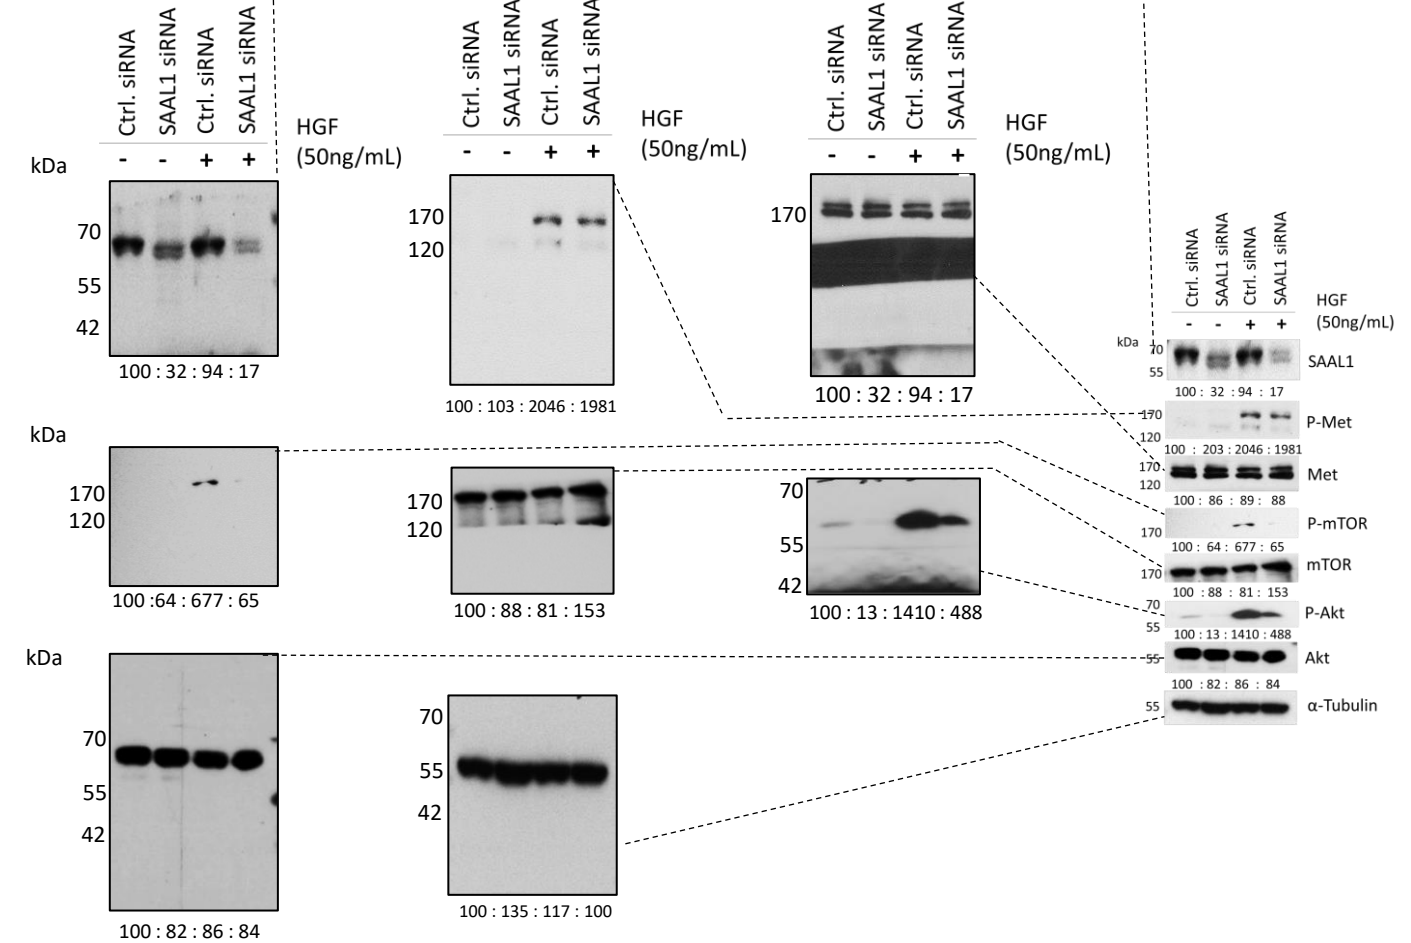

Figure 4B

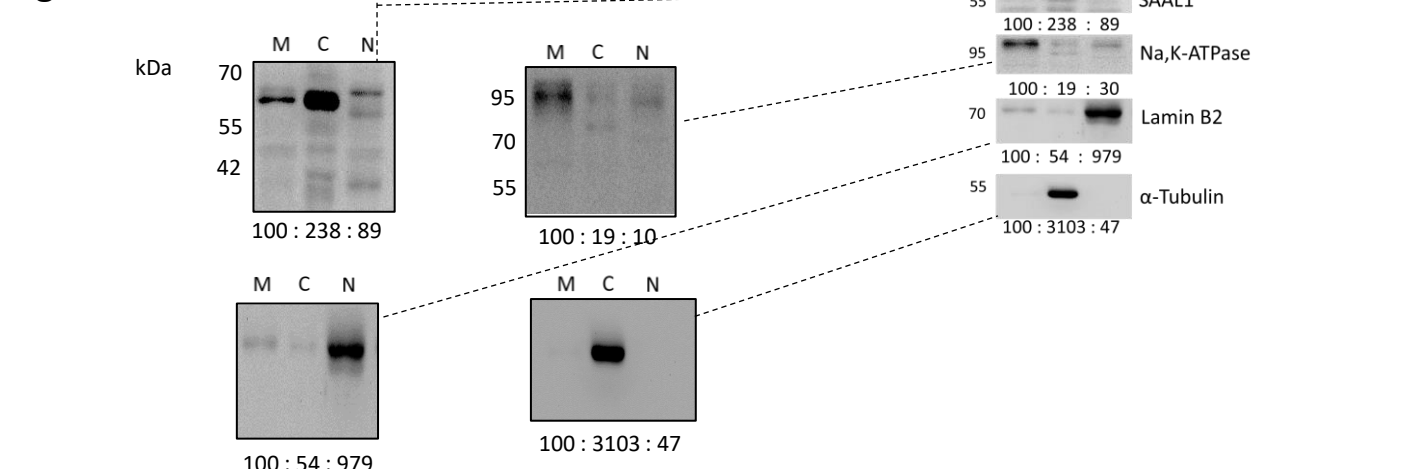

Supplement: s1 [file s1]
